# Supplementary material for: Phenotypes of undiagnosed adults with actionable OTC and GLA variants
Source: PubMed Central journal article supplement — HGG Adv. 2023 Jul 29;4(4):100226. doi: 10.1016/j.xhgg.2023.100226 (PMC10428110; doi:10.1016/j.xhgg.2023.100226), 2023-07-29
Supplement: mmc1.pdf [file mmc1.pdf]

**HGGA, Volume 4**

**Supplemental information**

**Phenotypes of undiagnosed adults**

**with actionable *OTC* and *GLA* variants**

**Jessica I. Gold, Sarina Madhavan, Joseph Park, Hana Zouk, Emma Perez, Alanna Strong, Theodore G. Drivas, Amel Karaa, Marc Yudkoff, Daniel Rader, Regeneron Genetics Center, Penn Medicine BioBank, Robert C. Green, and Nina B. Gold**

## Supplemental materials

### Table of contents

**Table S1.** Regeneron Genetics Center author information.

**Table S2.** Penn Medicine Biobank author information.

**Table S3.** RedCAP data capture form for Fabry disease.

**Table S4.** RedCAP data capture form for OTC deficiency.

**Table S5.** Table of participant demographics.

**Table S6.** American College of Medical Genetics variant classification criteria for *GLA* and *OTC* variants found in biobank participants.

**Table S1.** Regeneron Genetics Center author information.

Regeneron Genetics Center Banner Author List and Contribution Statements

**RGC Management and Leadership Team**

Goncalo Abecasis, PhD , Aris Baras, M.D. , Michael Cantor, M.D. , Giovanni Coppola, M.D. , Andrew Deubler , Aris Economides, Ph.D. , Luca A. Lotta, M.D., Ph.D. , John D. Overton, Ph.D. , Jeffrey G. Reid, Ph.D. , Katherine Siminovitch, M.D. , Alan Shuldiner, M.D.

**Sequencing and Lab Operations**

Christina Beechert , Caitlin Forsythe, M.S. , Erin D. Fuller , Zhenhua Gu, M.S. , Michael Lattari , Alexander Lopez, M.S. , John D. Overton, Ph.D. , Maria Sotiropoulos Padilla, M.S. , Manasi Pradhan, M.S. , Kia Manoochehri, B.S. , Thomas D. Schleicher, M.S. , Louis Widom , Sarah E. Wolf, M.S. , Ricardo H. Ulloa, B.S.

**Clinical Informatics**

Amelia Averitt, Ph.D. , Nilanjana Banerjee, Ph.D. , Michael Cantor, M.D. , Dadong Li, Ph.D. , Sameer Malhotra, M.D. , Deepika Sharma, MHI , Jeffrey Staples , Ph.D.

**Genome Informatics**

Xiaodong Bai, Ph.D. , Suganthi Balasubramanian, Ph.D. , Suying Bao, Ph.D. , Boris Boutkov, Ph.D. , Siying Chen, Ph.D. , Gisu Eom, B.S. , Lukas Habegger, Ph.D. , Alicia Hawes, B.S. , Shareef Khalid , Olga Krasheninina, M.S. , Rouel Lanche, B.S. , Adam J. Mansfield, B.A. , Evan K. Maxwell, Ph.D. , George Mitra, B.A. , Mona Nafde, M.S. , Sean O'Keeffe, Ph.D. , Max Orelus, B.B.A. , Razvan Panea, Ph.D. , Tommy Polanco, B.A. , Ayesha Rasool, M.S. , Jeffrey G. Reid, Ph.D. , William Salerno, Ph.D. , Jeffrey C. Staples, Ph.D. , Kathie Sun, Ph.D.

**Analytical Genomics and Data Science**

Goncalo Abecasis, D.Phil. , Joshua Backman, Ph.D. , Amy Damask, Ph.D. , Lee Dobbyn, Ph.D. , Manuel Allen Revez Ferreira, Ph.D. , Arkopravo Ghosh, M.S. , Christopher Gillies, Ph.D. , Lauren Gurski, B.S. , Eric Jorgenson, Ph.D. , Hyun Min Kang, Ph.D. , Michael Kessler, Ph.D. , Jack Kosmicki, Ph.D. , Alexander Li , Ph.D. , Nan Lin, Ph.D. , Daren Liu, M.S. , Adam Locke, Ph.D. , Jonathan Marchini, Ph.D. , Anthony Marcketta, M.S. , Joelle Mbatchou, Ph.D. , Arden Moscati, Ph.D. , Charles Paulding, Ph.D. , Carlo Sidore, Ph.D. , Eli Stahl, Ph.D. , Kyoko Watanabe, Ph.D. , Bin Ye, Ph.D. , Blair Zhang, Ph.D. , Andrey Ziyatdinov, Ph.D.

**Therapeutic Area Genetics**

Ariane Ayer, B.S. , Aysegul Guvenek, Ph.D. , George Hindy, Ph.D. , Giovanni Coppola, M.D. , Jan Freudenberg, M.D. , Jonas Bovijn M.D. , Katherine Siminovitch, M.D. , Kavita Praveen, Ph.D. , Luca A. Lotta, M.D. , Manav Kapoor, Ph.D. , Mary Haas, Ph.D. , Moeen Riaz , Ph.D. , Niek Verweij, Ph.D. , Olukayode Sosina, Ph.D. , Parsa Akbari, Ph.D. , Priyanka Nakka, Ph.D. , Sahar Gelfman, Ph.D. , Sujit Gokhale, B.E. , Tanima De, Ph.D. , Veera Rajagopal, Ph.D. , Alan Shuldiner, M.D. , Bin Ye, Ph.D. , Gannie Tzoneva, Ph.D. , Juan Rodriguez-Flores, Ph.D.

**Research Program Management & Strategic Initiatives**

Esteban Chen, M.S. , Marcus B. Jones, Ph.D. , Michelle G. LeBlanc, Ph.D. , Jason Mighty, Ph.D. , Lyndon J. Mitnaul, Ph.D. , Nirupama Nishtala, Ph.D. , Nadia Rana, Ph.D. , Jaimee Hernandez

**Table S2.** Penn Medicine Biobank author information.

## **Penn Medicine BioBank Banner Author List and Contribution Statements**

### **PMBB Leadership Team**

Daniel J. Rader, M.D., Marylyn D. Ritchie, Ph.D., Michael D. Feldman M.D.

Contribution: All authors contributed to securing funding, study design and oversight. All authors reviewed the final version of the manuscript.

### **Patient Recruitment and Regulatory Oversight**

JoEllen Weaver, Nawar Naseer, Ph.D., M.P.H., Afiya Poindexter, Ashlei Brock, Khadijah Hu-Sain, Yi-An Ko

Contributions: JW manages patient recruitment and regulatory oversight of study. NN manages participant engagement, assists with regulatory oversight, and researcher access. AP, AB, KH, YK perform recruitment and enrollment of study participants.

### **Lab Operations**

JoEllen Weaver, Meghan Livingstone, Fred Vadivieso, Ashley Kloter, Stephanie DerOhannessian, Teo Tran, Linda Morrel, Ned Haubein, Joseph Dunn

Contribution: JW, ML, FV, SD conduct oversight of lab operations. ML, FV, AK, SD, TT, LM perform sample processing. NH, JD are responsible for sample tracking and the laboratory information management system.

### **Clinical Informatics**

Anurag Verma, Ph.D., Colleen Morse, M.S., Marjorie Risman, M.S., Renae Judy, B.S.

Contribution: All authors contributed to the development and validation of clinical phenotypes used to identify study subjects and (when applicable) controls.

### **Genome Informatics**

Anurag Verma Ph.D., Shefali S. Verma, Ph.D., Yuki Bradford, M.S., Scott Dudek, M.S., Theodore Drivas, M.D., PH.D.

Contribution: A.V., S.S.V. are responsible for the analysis, design, and infrastructure needed to quality control genotype and exome data. Y.B. performs the analysis. T.D. and A.V. provides variant and gene annotations and their functional interpretation of variants.

# Fabry Chart Review

---

Record ID

---

---

Variant

---

---

MRN

---

---

Sex

- Male  
 Female

---

Age

---

---

Race

- American Indian or Alaskan Native  
 Asian Indian  
 Black or African American  
 East Asian  
 Native Hawaiian or Pacific Islander  
 Other  
 White

---

Ethnicity

- Hispanic  
 Not Hispanic

---

Diagnosed with Fabry?

- Yes  
 No

---

Age at diagnosis

---

---

Method of Dx

---

---

Seeing genetics?

- Yes  
 No

---

Receiving treatment for Fabry?

- Yes  
 No

---

What treatment?

---

---

Problem list

---

---

Family history

---

---

Current medications

---

**Specialists seen**

|             | Yes                   | No                    |
|-------------|-----------------------|-----------------------|
| Ophtho      | <input type="radio"/> | <input type="radio"/> |
| Renal       | <input type="radio"/> | <input type="radio"/> |
| Neuro       | <input type="radio"/> | <input type="radio"/> |
| Cardiology  | <input type="radio"/> | <input type="radio"/> |
| Dermatology | <input type="radio"/> | <input type="radio"/> |

---

Last ophtho A/P

---

---

Last renal A/P

---

---

Last neuro A/P

---

---

Last cardiology A/P

---

---

Last derm a/p

---

---

Other Specialists seen

---

**Presence of Fabry symptoms**

|                                  | Yes                   | No                    |
|----------------------------------|-----------------------|-----------------------|
| distal extremity pain/discomfort | <input type="radio"/> | <input type="radio"/> |
| Neuropathic pain                 | <input type="radio"/> | <input type="radio"/> |
| Exercise Intolerance             | <input type="radio"/> | <input type="radio"/> |
| Cold Intolerance                 | <input type="radio"/> | <input type="radio"/> |
| Heat Intolerance                 | <input type="radio"/> | <input type="radio"/> |
| Hypohydrosis                     | <input type="radio"/> | <input type="radio"/> |
| Corneal problems                 | <input type="radio"/> | <input type="radio"/> |
| Proteinuria                      | <input type="radio"/> | <input type="radio"/> |

|                                        |                       |                       |
|----------------------------------------|-----------------------|-----------------------|
| Chronic Kidney disease                 | <input type="radio"/> | <input type="radio"/> |
| s/p renal transplant                   | <input type="radio"/> | <input type="radio"/> |
| requiring dialysis                     | <input type="radio"/> | <input type="radio"/> |
| GI symptoms                            | <input type="radio"/> | <input type="radio"/> |
| Angiokeratomas                         | <input type="radio"/> | <input type="radio"/> |
| Cardiomyopathy                         | <input type="radio"/> | <input type="radio"/> |
| Aortic disease                         | <input type="radio"/> | <input type="radio"/> |
| Cardiac valve disease                  | <input type="radio"/> | <input type="radio"/> |
| Arrhythmia                             | <input type="radio"/> | <input type="radio"/> |
| Heart failure                          | <input type="radio"/> | <input type="radio"/> |
| Myocardial infarction                  | <input type="radio"/> | <input type="radio"/> |
| s/p stent placement or CABG            | <input type="radio"/> | <input type="radio"/> |
| s/p ICD or pacemaker placement         | <input type="radio"/> | <input type="radio"/> |
| s/p heart transplant or LVAD placement | <input type="radio"/> | <input type="radio"/> |
| Stroke                                 | <input type="radio"/> | <input type="radio"/> |
| Vertigo                                | <input type="radio"/> | <input type="radio"/> |
| TIA                                    | <input type="radio"/> | <input type="radio"/> |
| hearing loss                           | <input type="radio"/> | <input type="radio"/> |

---

Cardiac Testing

- EKG
- Echocardiogram
- Stress Test
- Cardiac MRI
- CTA chest
- Cardiac biopsy
- Troponin
- BNP
- Lipid panel
- Other

---

Results of last EKG

---

---

Results of last echocardiogram

---

---

Results of last stress test

---

---

Results of last cardiac MRI

---

---

Results of last CTA chest

---

---

Troponin results

---

---

BNP levels (maximum and most recent)

---

---

Last lipid panel results

---

---

Cardiac Biopsy

---

---

Other cardiac results: what test and results

---

---

Renal testing

- UA
- Urine protein
- Urine microalbumin
- BMP
- Cystatin C
- Renal Ultrasound
- Renal Biopsy
- Other

---

UA results

---

---

Urine protein/creatinine ratio

---

---

Urine microalbumin results

---

---

Last serum Cr

---

---

Max serum Cr

---

---

Current GFR

---

---

Cystatin C results

---

---

Renal Ultrasound results

---



---

Renal Biopsy results

---

---

Other renal testing: what and results?

---

---

Neurological Testing

- CT Brain
- MRI Brain
- MRA Head/Neck
- Carotid Ultrasound
- EMG/NCV
- Other Ultrasound (I.e. carpal tunnel)
- Other

---

CT head results

---

---

MRI Brain results

---

---

MRA head/neck results

---

---

Carotid Ultrasound results

---

---

EMG/NCV results

---

---

Other ultrasound: what ultrasound and results

---

---

Other neuro tests: what test and results

---

---

Other comments

---

# Otc Deficiency

Record ID

\_\_\_\_\_

Record ID

\_\_\_\_\_

## Basic Demographic Info

Variant

\_\_\_\_\_

MRN

\_\_\_\_\_

Biological sex

- Male
- Female

Age

\_\_\_\_\_

Race

- American Indian or Alaskan Native
- Asian Indian
- Black or African American
- East Asian
- Native Hawaiian or Pacific Islander
- White
- Other
- Unknown

Ethnicity

- Hispanic
- Not Hispanic
- Unknown

Diagnosed with OTC?

- Yes
- No

Age at diagnosis

\_\_\_\_\_

Followed by medical genetics?

- Yes
- No

Problem list

\_\_\_\_\_

Current medications

\_\_\_\_\_

**Family History**

Family history

---

**Family history suggestive of OTC deficiency**

|                                                      | Yes                   | No                    |
|------------------------------------------------------|-----------------------|-----------------------|
| Known OTC deficiency                                 | <input type="radio"/> | <input type="radio"/> |
| Urea cycle disorders                                 | <input type="radio"/> | <input type="radio"/> |
| Unexplained newborn male death                       | <input type="radio"/> | <input type="radio"/> |
| Cerebral palsy NOS                                   | <input type="radio"/> | <input type="radio"/> |
| Migraines / Headaches                                | <input type="radio"/> | <input type="radio"/> |
| Psychiatric conditions                               | <input type="radio"/> | <input type="radio"/> |
| Recurrent vomiting                                   | <input type="radio"/> | <input type="radio"/> |
| Other decompensation during hospitalization / stress | <input type="radio"/> | <input type="radio"/> |

**Pregnancy History**

Ever pregnant?  Yes  No

Living children. List as (#M, #F)

---

**Other pregnancy history suggestive of OTC deficiency**

|                                                                   | Yes                   | No                    |
|-------------------------------------------------------------------|-----------------------|-----------------------|
| Spontaneous abortion                                              | <input type="radio"/> | <input type="radio"/> |
| Had newborn male child who died                                   | <input type="radio"/> | <input type="radio"/> |
| Had male child with sepsis in first week of life                  | <input type="radio"/> | <input type="radio"/> |
| Had male child with failure to thrive in first week of life       | <input type="radio"/> | <input type="radio"/> |
| Had male child with somnolence in first week of life              | <input type="radio"/> | <input type="radio"/> |
| Had a male child with unexplained tachypnea in first week of life | <input type="radio"/> | <input type="radio"/> |
| elective abortion                                                 | <input type="radio"/> | <input type="radio"/> |

Other pregnancy history

---

**Specialists seen**

|            | Yes                   | No                    |
|------------|-----------------------|-----------------------|
| Psychiatry | <input type="radio"/> | <input type="radio"/> |
| Neurology  | <input type="radio"/> | <input type="radio"/> |
| OB/GYN     | <input type="radio"/> | <input type="radio"/> |
| GI         | <input type="radio"/> | <input type="radio"/> |
| Nutrition  | <input type="radio"/> | <input type="radio"/> |

Last Neurology A/P

\_\_\_\_\_

Last Psychiatry A/P

\_\_\_\_\_

Last OB/GYN A/P

\_\_\_\_\_

Last GI A/P

\_\_\_\_\_

Last Nutrition A/P

\_\_\_\_\_

**Presence of OTC deficiency symptoms**

|                                          | Yes                   | No                    |
|------------------------------------------|-----------------------|-----------------------|
| Delirium                                 | <input type="radio"/> | <input type="radio"/> |
| Encephalopathy or Altered Mental Status  | <input type="radio"/> | <input type="radio"/> |
| Psychosis or erratic behavior NOS        | <input type="radio"/> | <input type="radio"/> |
| Anxiety/Depression                       | <input type="radio"/> | <input type="radio"/> |
| Recurrent vomiting                       | <input type="radio"/> | <input type="radio"/> |
| Headaches / Migraine headaches           | <input type="radio"/> | <input type="radio"/> |
| Seizure                                  | <input type="radio"/> | <input type="radio"/> |
| Allergy to protein / protein intolerance | <input type="radio"/> | <input type="radio"/> |
| HCC                                      | <input type="radio"/> | <input type="radio"/> |
| Reye-like syndrome                       | <input type="radio"/> | <input type="radio"/> |
| Executive function deficits              | <input type="radio"/> | <input type="radio"/> |
| Mild cognitive impairment                | <input type="radio"/> | <input type="radio"/> |

Self-restriction of protein / Vegetarian diet / Avoidance of milk, red meat, eggs, high-protein foods (list specific food restrictions)

\_\_\_\_\_

Headache description (From most recent PCP A/P Problem list)

\_\_\_\_\_

**Presence of OTC deficiency symptoms during precipitating events or catabolic stress**

|                                        | Altered Mental Status    | Vomiting                 | Headache                 |
|----------------------------------------|--------------------------|--------------------------|--------------------------|
| Pregnancy and/or Delivery              | <input type="checkbox"/> | <input type="checkbox"/> | <input type="checkbox"/> |
| Systemic corticosteroid administration | <input type="checkbox"/> | <input type="checkbox"/> | <input type="checkbox"/> |
| Infection                              | <input type="checkbox"/> | <input type="checkbox"/> | <input type="checkbox"/> |
| Trauma (e.g. motor vehicle collision)  | <input type="checkbox"/> | <input type="checkbox"/> | <input type="checkbox"/> |
| Cancer therapy                         | <input type="checkbox"/> | <input type="checkbox"/> | <input type="checkbox"/> |
| Meat/protein ingestion                 | <input type="checkbox"/> | <input type="checkbox"/> | <input type="checkbox"/> |

**Labs/Imaging**

Neurologic testing  EEG  
 Head CT  
 Head MRI  
 Other neuropsych testing

Results of any abnormal EEG  
 \_\_\_\_\_

Head CT Results  
 \_\_\_\_\_

Head MRI Results  
 \_\_\_\_\_

What other neuropsych testing and results  
 \_\_\_\_\_

Other imaging  Abdominal US  
 CT A/P  
 Other Liver imaging

Results of last abdominal U/S  
 \_\_\_\_\_

Results of last CT A/P (Liver Findings and Impression)  
 \_\_\_\_\_

Other liver imaging: what test and results  
 \_\_\_\_\_

---

Other Labs

- Ammonia (serum)
- Blood gas
- LFTs
- PT/PTT
- Urine studies

---

Serum ammonia levels with dates

\_\_\_\_\_

---

ABG showing respiratory alkalosis?

- Yes
- No

---

Last AST/ALT

\_\_\_\_\_

---

Last PT/PTT

\_\_\_\_\_

---

Elevated urine orotic acid

---

Other comments

\_\_\_\_\_

**Table S5.** Table of participant demographics.

|                       | <i>OTC</i> PLPV | <i>GLA</i> PLPV |
|-----------------------|-----------------|-----------------|
| Total                 | 3               | 3               |
| Female, n (%)         | 3 (100)         | 1 (33.3)        |
| Age, Mean $\pm$ SD    | 51 (11.8)       | 54.3 (17.6)     |
| Race/Ethnicity, n (%) |                 |                 |
| Asian                 | 0 (0)           | 0 (0)           |
| Black                 | 1 (33.3)        | 0 (0)           |
| Other                 | 0 (0)           | 0 (0)           |
| White, Hispanic       | 0 (0)           | 0 (0)           |
| White, Non-Hispanic   | 2 (66.7)        | 3 (100)         |

**Table S6.** American College of Medical Genetics variant classification criteria for *GLA* and *OTC* variants found in biobank participants.

| Gene       | DNA      | Protein     | Classification    | Classification Criteria |          |          |               | Allelic fraction |
|------------|----------|-------------|-------------------|-------------------------|----------|----------|---------------|------------------|
|            |          |             |                   | Very Strong             | Strong   | Moderate | Supporting    |                  |
| <i>GLA</i> | c.335G>A | p.Arg112His | Pathogenic        |                         | PS3, PS4 | PM2, PM5 | PP1, PP3      | 1.00 (male)      |
| <i>GLA</i> | c.647A>G | p.Tyr216Cys | Likely Pathogenic |                         | PS4      | PM3      | PP1, PP3      | 1.00 (male)      |
| <i>GLA</i> | c.868A>C | p.Met290Leu | Likely Pathogenic |                         | PS4      | PM2      | PM2, PP1, PP4 | 0.56 (female)    |
| <i>OTC</i> | c.118C>T | p.Arg40Cys  | Likely pathogenic |                         | PS3      | PM2, PM5 | PP!           | 0.50 (female)    |
| <i>OTC</i> | c.274C>T | p.Arg92*    | Pathogenic        | PVS1                    | PS3      | PM2      | PP3           | 0.48 (female)    |
| <i>OTC</i> | c.583G>A | p.Gly195Arg | Pathogenic        |                         | PS3      | PM2, PM5 | PP3, PP5      | 0.65 (female)    |
